# Supplementary material
Source: PubMed Central journal article supplement (PMC8085838)
Supplement: ajcr0011-1304-f9.pdf [file ajcr0011-1304-f9.pdf]

## Decursin and autophagy in gastric cancer

**Supplementary Table 1.** The primers used in this study

| Gene name    | Primer sequence                        |
|--------------|----------------------------------------|
| <i>CDK4</i>  | sense: 5'-GAGTGTGAGAGTCCCAATG-3'       |
|              | antisense: 5'-GGTCCTGGTCTACATGCTCAA-3' |
| <i>CDK6</i>  | sense: 5'-GGATAAAGTCCAGAGCCTGG-3'      |
|              | antisense: 5'-GGCCGAAGTCAGCGAGTTTT-3'  |
| <i>E2F1</i>  | sense: 5'-CCTGGCCTACGTGACGTGTC-3'      |
|              | antisense: 5'-CGGCTTGGAGCTGGGTCT-3'    |
| <i>E2F2</i>  | sense: 5'-GAGGACAAGGCCAACAAGAGG-3'     |
|              | antisense: 5'-TGTCGGGCACTTCCAGTCTC-3'  |
| <i>E2F3</i>  | sense: 5'-CACTTCCACCACCTCCTGTT-3'      |
|              | antisense: 5'-TGACCGCTTCTCCTAGCTC-3'   |
| <i>GAPDH</i> | sense: 5'-GAGTCAACGGATTGGTCGT-3'       |
|              | antisense: 5'-TTGATTTGGAGGGATCTCG-3'   |

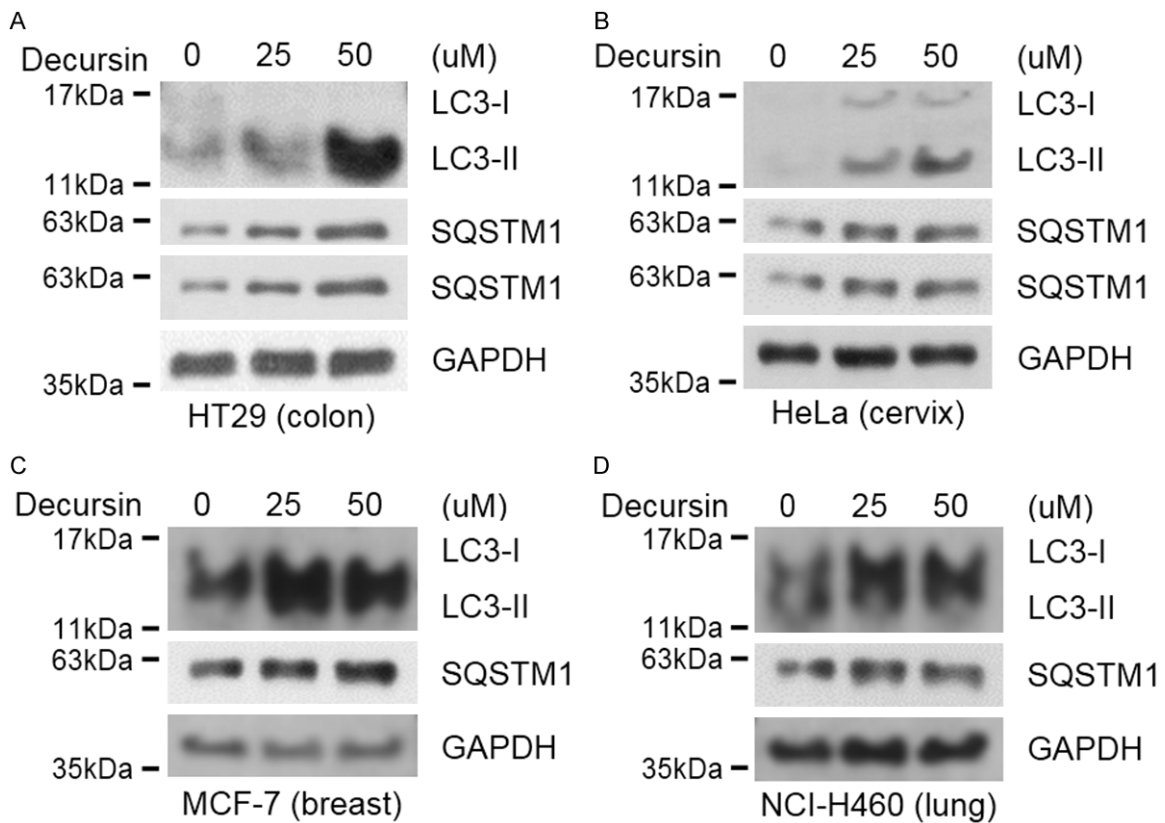

**Supplementary Figure 1.** Decursin acts as an autophagy inhibitor in other cancer cell lines. A-D. Each cell line was treated with decursin for 24 h; expression levels of LC3 and SQSTM1 were assessed by western blotting. Full-length blots are presented in [Supplementary Figure 6](#).

## Decursin and autophagy in gastric cancer

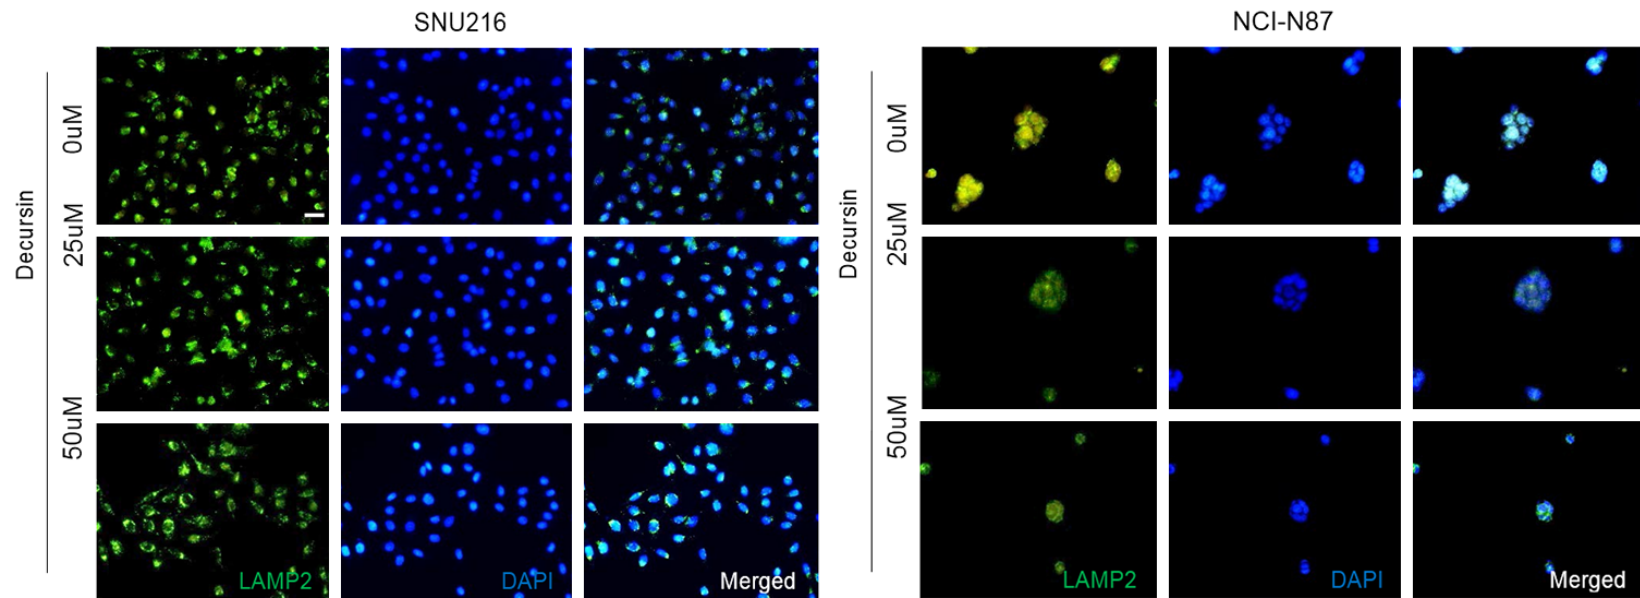

**Supplementary Figure 2.** Expression of LAMP2 after decursin treatment of GC cells. Immunocytochemistry revealed that LAMP2 in SNU216 and NCI-N87 cells did not change, regardless of decursin concentration ( $\times 100$ ). Scale bar: 50  $\mu\text{m}$ .

## Decursin and autophagy in gastric cancer

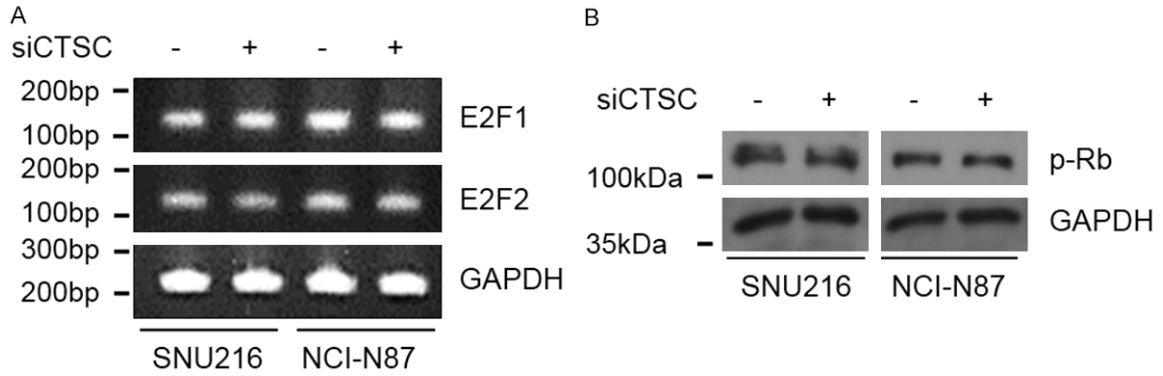

**Supplementary Figure 3.** Cell cycle-related gene expression after cathepsin C knockdown. A. mRNA expression levels of E2F1, E2F2, and E2F3, were confirmed. E2F3 exhibited a change after transfection with siCTSC, whereas E2F1 and E2F2 did not. B. Phosphorylation of Rb, which binds E2F3 and regulates its expression, was confirmed; however, its phosphorylation levels did not change. Full-length blots are presented in [Supplementary Figure 6](#).

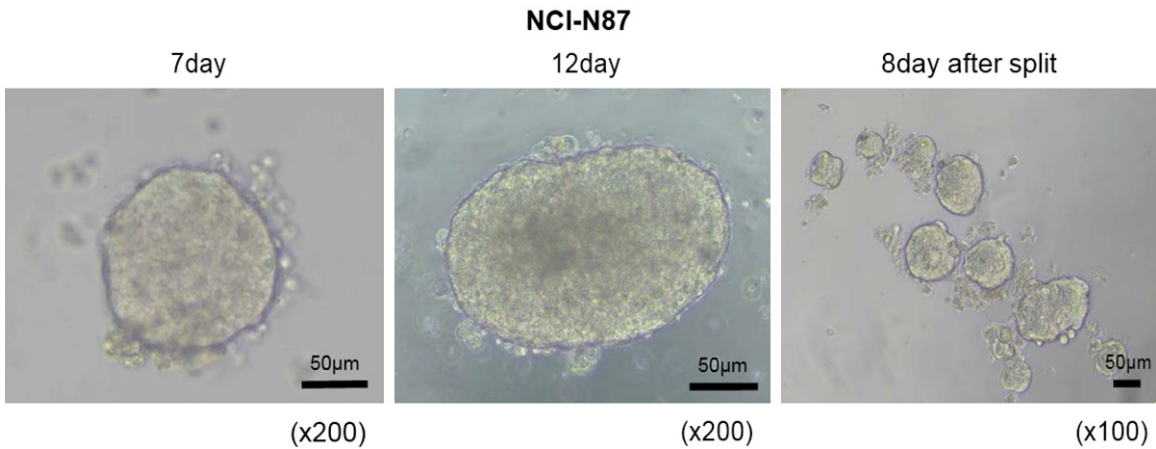

**Supplementary Figure 4.** Gastric tumouroid formation. Generation of a spheroid from NCI-N87 cells after 7 and 12 days, as well as 8 days after split into 6-well low attachment dishes (×200). Scale bar: 50 µm.

## Decursin and autophagy in gastric cancer

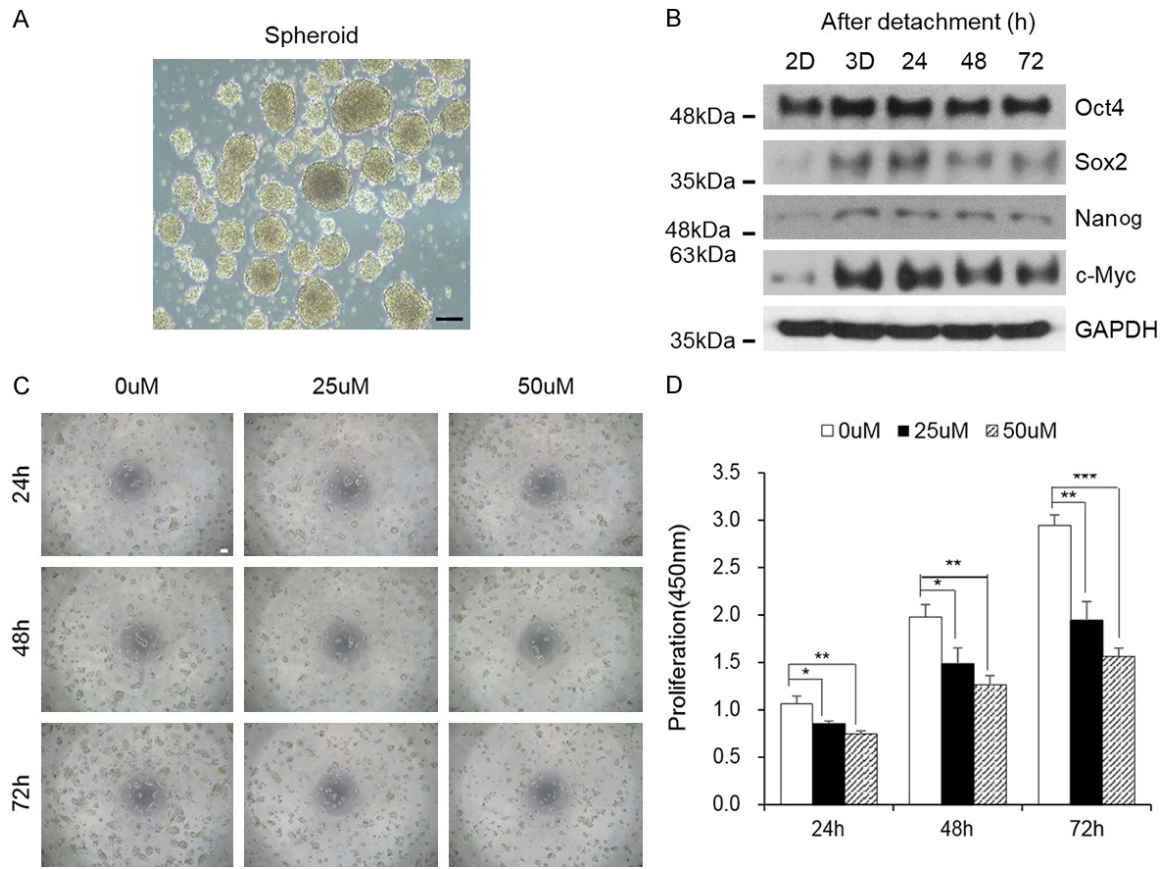

**Supplementary Figure 5.** Decursin treatment after 3D culture of NCI-N87 cells. A. Representative images are well-formed spheroids using NCI-N87 cell lines ( $\times 100$ ). Scale bar: 50  $\mu\text{m}$ . B. Comparison of stem cell marker expression between 2D and 3D cultured cells. Stem cell markers were maintained until 72 h after dissociation of 3D cultured cells. Full-length blots are presented in [Supplementary Figure 6](#). C, D. 3D cultured cells were dissociated again in 2D and re-seeded in 96-well plates. Then, cells were treated with decursin and proliferation was measured at indicated times ( $\times 40$ ). Scale bar: 100  $\mu\text{m}$ . \* $P < 0.05$ ; \*\* $P < 0.01$ ; \*\*\* $P < 0.001$ .

# Decursin and autophagy in gastric cancer

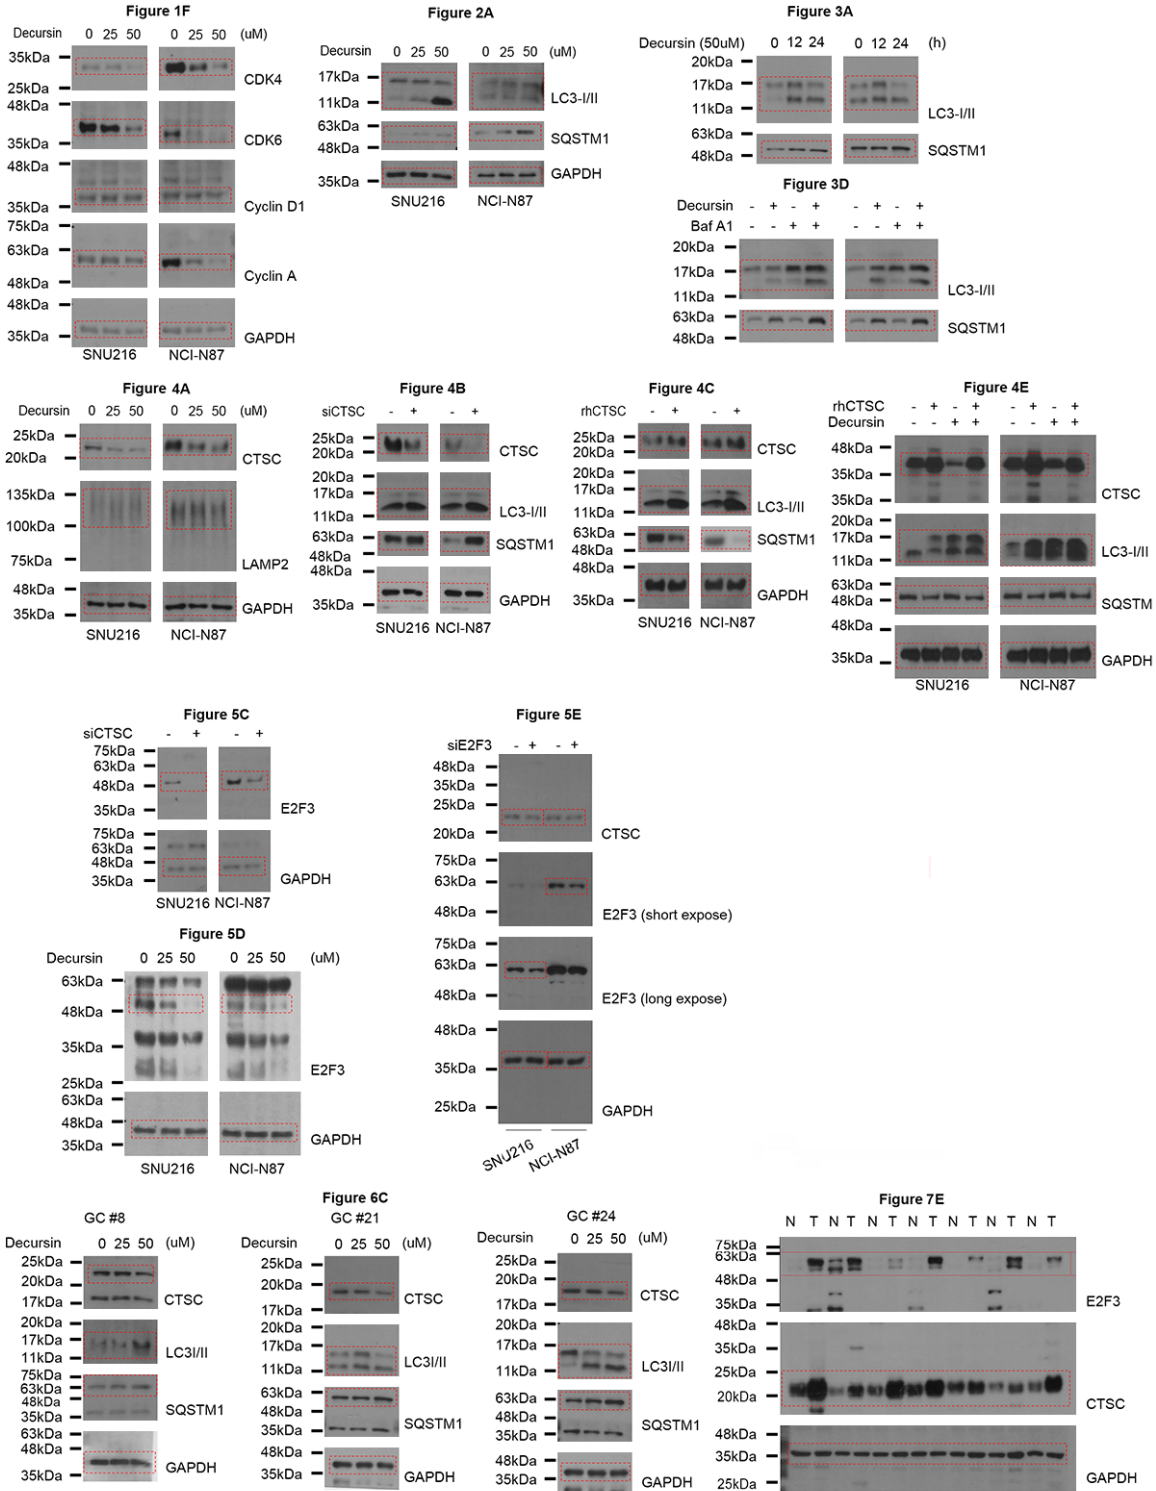

# Decursin and autophagy in gastric cancer

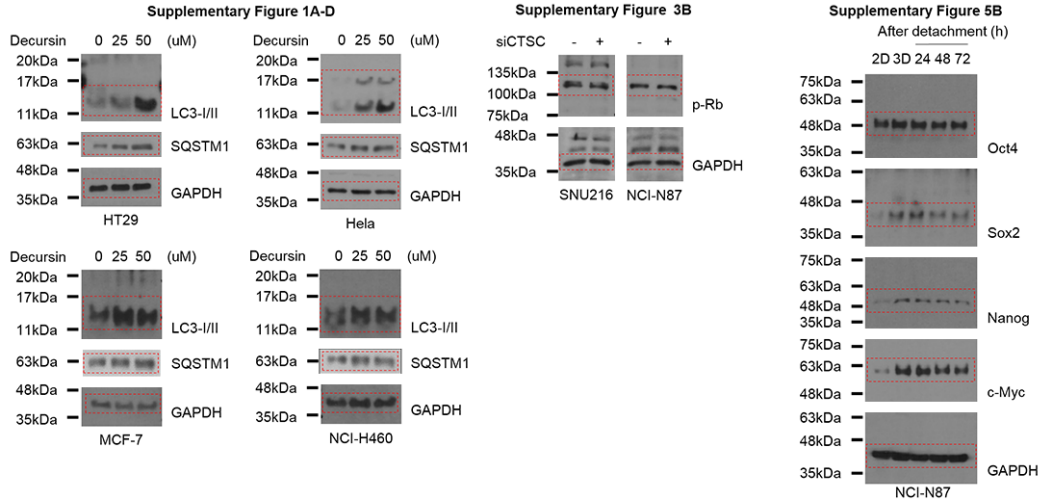

**Supplementary Figure 6.** Uncropped scans of western blots displayed in **Figures 1F, 2A, 3A, 3D, 4A-4E, 5C-E, 6C, 7E, Supplementary Figures 1A-D, 3B and 5B.**

**Supplementary Table 2.** Patient information on patient-derived gastric cancer organoids

| No     | Gender | Age | WHO                       | Lauren     | pStage  |
|--------|--------|-----|---------------------------|------------|---------|
| GC #8  | M      | 72  | Poorly cohesive carcinoma | Diffuse    | pT2N2M0 |
| GC #21 | F      | 44  | Poorly cohesive carcinoma | Diffuse    | pT3N0M0 |
| GC #24 | M      | 81  | Tubular adenocarcinoma    | Intestinal | pT2N0M0 |

WHO, World Health Organization classification; Lauren, Lauren classification; pStage, pathologic stage.
